# Supplementary material for: Effect of Nano-Selenium on Nutritional Quality of Cowpea and Response of ABCC Transporter Family
Source: MDPI journal article supplement (doi:10.3390/molecules28031398), 2023-02-01
Supplement: s1 [file s1]

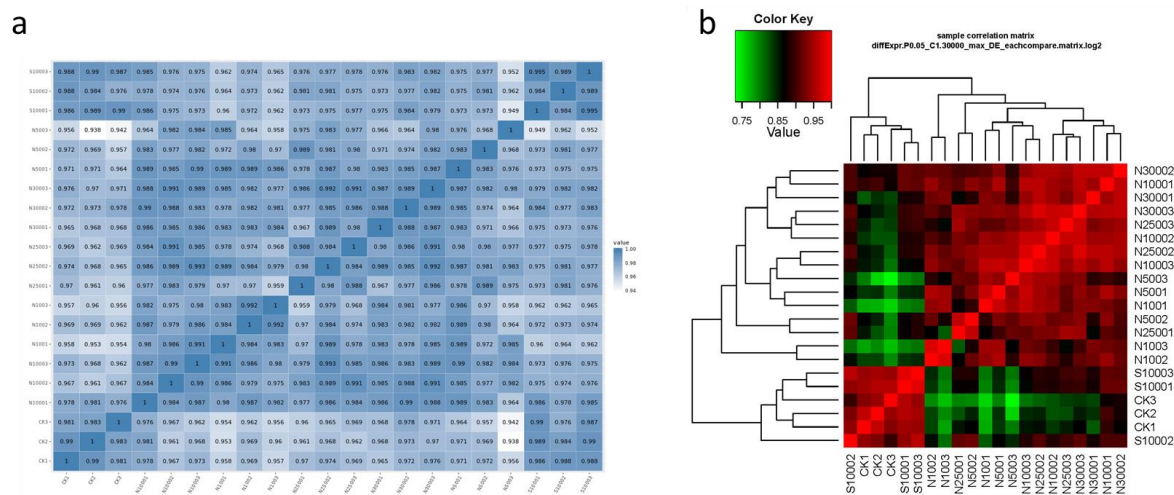

**Figure S1.** The heat map of correlation analysis of data among cowpea transcriptome samples.

- Heat map of Pearson correlation coefficient between samples.
- Sample correlation matrix.

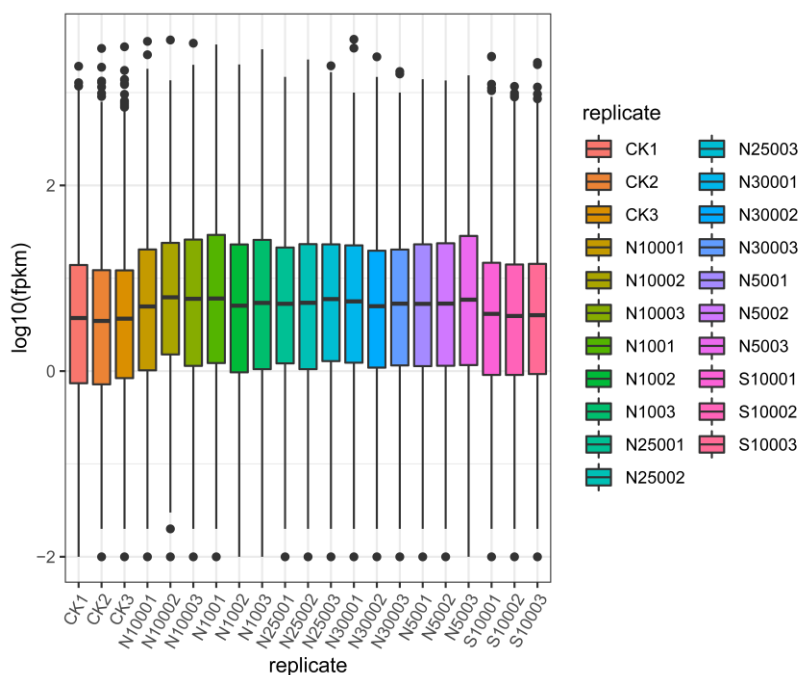

**Figure S2.** Density distribution of cowpea transcriptome data.



**Table S1.** Analysis on the number and proportion of differentially expressed genes in ABC gene family of cowpea in different treatment groups.

| Treatment sample | Total | Up/Down-regulated | Number and total proportion of differential expression of ABCB, ABCC, ABCG subfamilies |      |      |                  |
|------------------|-------|-------------------|----------------------------------------------------------------------------------------|------|------|------------------|
|                  |       |                   | ABCB                                                                                   | ABCC | ABCG | Total proportion |
| CK-N100          | 102   | 51/51             | 25                                                                                     | 13   | 41   | 77.5 %           |
| CK-N500          | 98    | 49/49             | 24                                                                                     | 13   | 38   | 76.3 %           |
| CK-N1000         | 104   | 55/49             | 25                                                                                     | 13   | 43   | 77.8 %           |
| CK-N2500         | 102   | 56/46             | 26                                                                                     | 13   | 40   | 77.5 %           |
| CK-N3000         | 103   | 44/59             | 25                                                                                     | 13   | 42   | 77.7 %           |
| CK-S1000         | 102   | 60/42             | 25                                                                                     | 13   | 40   | 76.5 %           |
| N100-N500        | 100   | 52/48             | 24                                                                                     | 13   | 40   | 77.0 %           |
| N100-N1000       | 102   | 54/48             | 24                                                                                     | 13   | 42   | 77.5 %           |
| N100-N2500       | 102   | 54/48             | 24                                                                                     | 13   | 42   | 77.5 %           |
| N100-N3000       | 100   | 44/56             | 24                                                                                     | 13   | 40   | 77.0 %           |
| N500-N1000       | 102   | 54/48             | 24                                                                                     | 13   | 42   | 77.5 %           |
| N500-N2500       | 101   | 50/51             | 25                                                                                     | 13   | 40   | 77.2 %           |
| N500-N3000       | 101   | 49/52             | 24                                                                                     | 13   | 41   | 77.2 %           |
| N1000-N2500      | 103   | 50/53             | 25                                                                                     | 13   | 42   | 77.7 %           |
| N1000-N3000      | 104   | 45/59             | 25                                                                                     | 13   | 43   | 77.9 %           |
| N2500-N3000      | 102   | 41/61             | 25                                                                                     | 13   | 41   | 77.5 %           |
| N1000-S1000      | 103   | 54/49             | 24                                                                                     | 13   | 43   | 77.7 %           |

**Table S2.** Treatment concentration and sampling tissue of cowpea.

| Sample name | Reagent                          | Treatment concentration (mmol/L) | Purpose                                    | Tissue                |
|-------------|----------------------------------|----------------------------------|--------------------------------------------|-----------------------|
| CK          | H <sub>2</sub> O                 | 0                                | Physiological indicators and transcriptome | Young leaves and pods |
| N100        | SeNPs                            | 0.1                              | Physiological indicators and transcriptome | Young leaves and pods |
| N500        | SeNPs                            | 0.5                              | Physiological indicators and transcriptome | Young leaves and pods |
| N1000       | SeNPs                            | 1.0                              | Physiological indicators and transcriptome | Young leaves and pods |
| N2500       | SeNPs                            | 2.5                              | Physiological indicators and transcriptome | Young leaves and pods |
| N3000       | SeNPs                            | 3.0                              | Physiological indicators and transcriptome | Young leaves and pods |
| S100        | Na <sub>2</sub> SeO <sub>3</sub> | 0.1                              | Physiological indicators                   | Pods                  |
| S500        | Na <sub>2</sub> SeO <sub>3</sub> | 0.5                              | Physiological indicators                   | Pods                  |

|       |                                  |     |                                               |                          |
|-------|----------------------------------|-----|-----------------------------------------------|--------------------------|
| S1000 | Na <sub>2</sub> SeO <sub>3</sub> | 1.0 | Physiological indicators and<br>transcriptome | Young leaves<br>and pods |
| S2500 | Na <sub>2</sub> SeO <sub>3</sub> | 2.5 | Physiological indicators                      | Pods                     |
| S3000 | Na <sub>2</sub> SeO <sub>3</sub> | 3.0 | Physiological indicators                      | Pods                     |

---
